# Supplementary material for: Biomarkers of Hand Osteoarthritis Are Detectable after Mechanical Exercise
Source: PubMed Central journal article supplement (PMC6832610; doi:10.3390/jcm8101545), 2019-09-26
Supplement: jcm-08-01545-s001.pdf [file jcm-08-01545-s001.pdf]

## Biomarkers of Hand Osteoarthritis are Detectable after Mechanical Exercise

Bender A, Kaesser U, Eichner G, Bachmann G and Steinmeyer J

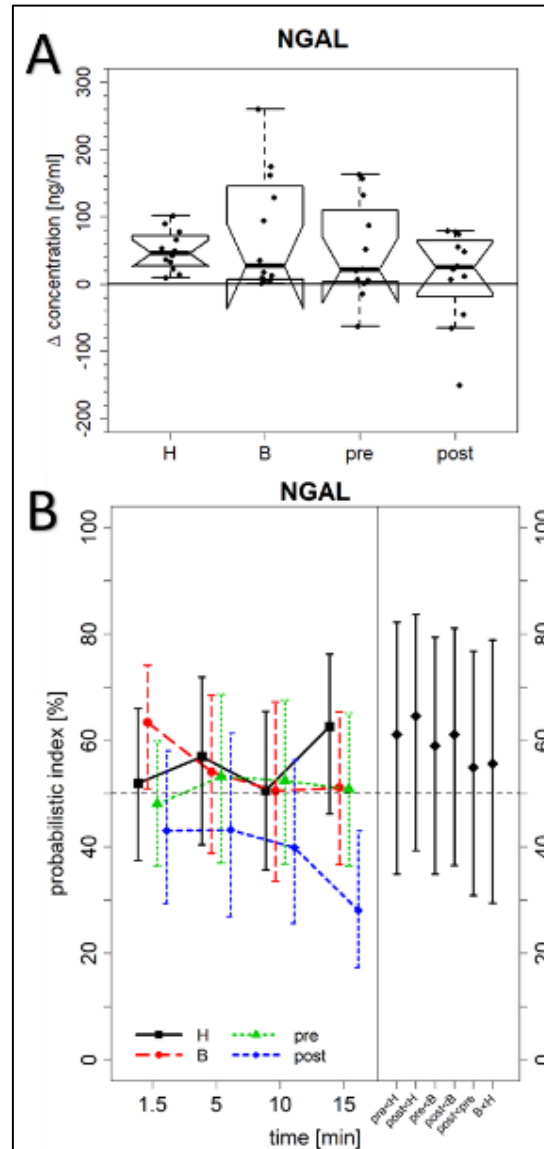

**Figure S1.** Serum concentrations of NGAL. **(A)** The difference between the maximum biomarker concentration within the first 15 minutes after exercising of the hand and finger joints and the NGAL level at baseline before exercising [H = cohort of patients with more Heberden-accentuated hand OA ( $p = 0.0005$ ,  $n = 12$ ), B = cohort of patients with more Bouchard-accentuated hand OA ( $p = 0.005$ ,  $n = 12$ ); pre = premenopausal control group ( $p = 0.03$ ,  $n = 12$ ); post = postmenopausal control group ( $p = 0.30$ ,  $n = 12$ )]. For further details see caption of Figure 2A. **(B)** Fully analogous to Figure 2B, but here for NGAL concentrations.

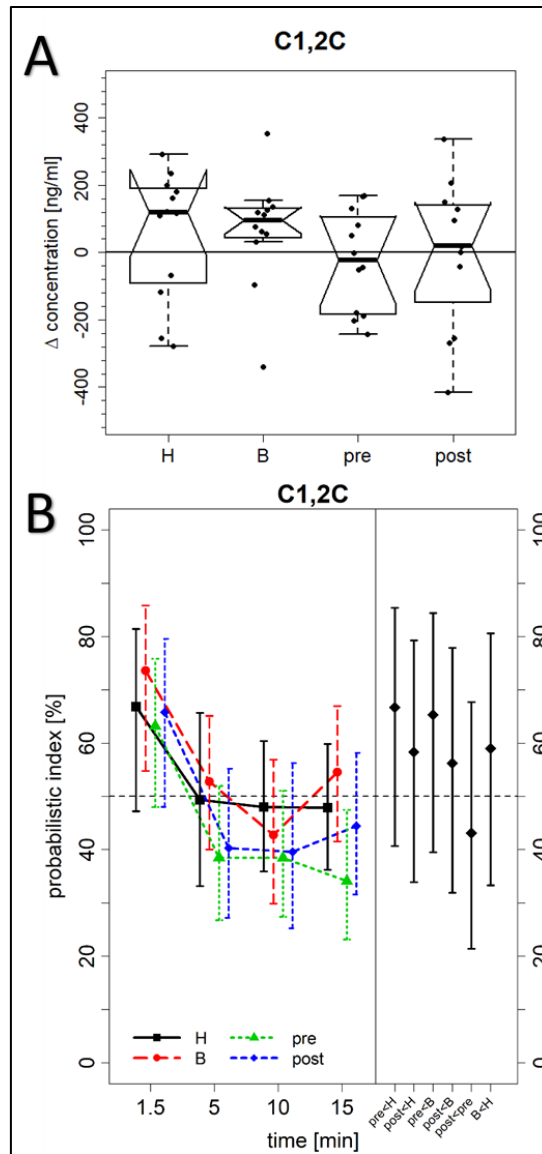

**Figure S2.** Serum concentrations of C1,2C. **(A)** The difference between the maximum biomarker concentration within the first 15 minutes after exercising of the hand and finger joints and the C1,2C level at baseline before exercising [H = cohort of patients with more Heberden-accentuated hand OA ( $p = 0.34$ ,  $n = 12$ ), B = cohort of patients with more Bouchard-accentuated hand OA ( $p = 0.08$ ,  $n = 12$ ); pre = premenopausal control group ( $p = 0.47$ ,  $n = 12$ ); post = postmenopausal control group ( $p = 0.90$ ,  $n = 12$ )]. For further details see caption of Figure 2A. **(B)** Fully analogous to Figure 2B, but here for C1,2C concentrations.

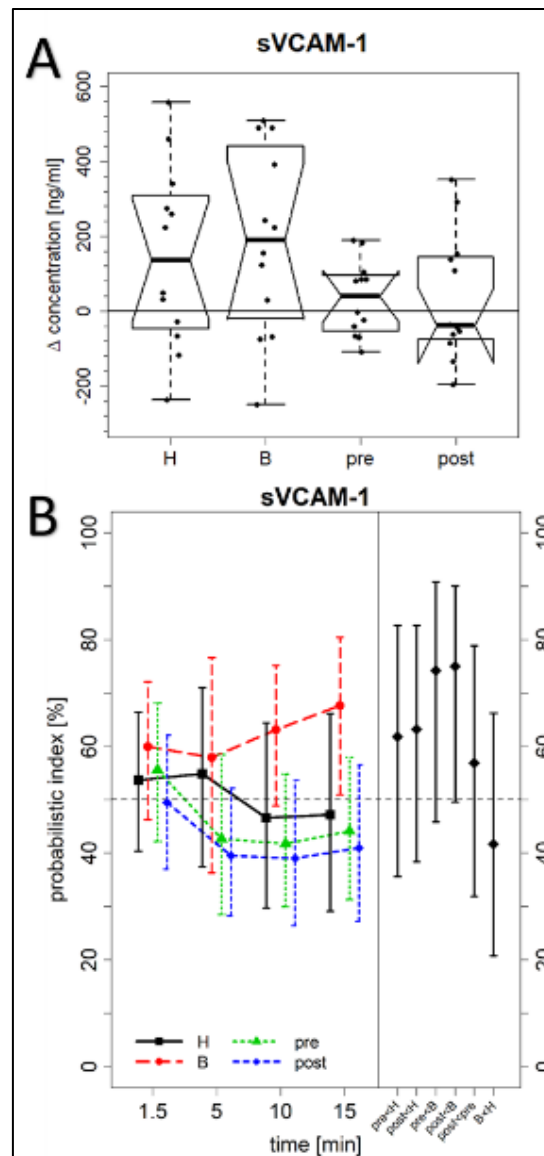

**Figure S3.** Serum concentrations of sVCAM1. **(A)** The difference between the maximum biomarker concentration within the first 15 min after exercising of the hand and finger joints and the sVCAM1 level at baseline before exercising [H = cohort of patients with more Heberden-accentuated hand OA ( $p = 0.04$ ,  $n = 12$ ), B = cohort of patients with more Bouchard-accentuated hand OA ( $p = 0.09$ ,  $n = 12$ ); pre = premenopausal control group ( $p = 0.30$ ,  $n = 12$ ); post = postmenopausal control group ( $p = 0.62$ ,  $n = 12$ )]. For further details see caption of Figure 2A. **(B)** Fully analogous to Figure 2B, but here for sVCAM1 concentrations.
